# Supplementary material for: The Metallochaperone Encoding Gene hypA Is Widely Distributed among Pathogenic Aeromonas spp. and Its Expression Is Increased under Acidic pH and within Macrophages
Source: PubMed Central journal article supplement (PMC6843854; doi:10.3390/microorganisms7100415), 2019-10-02
Supplement: microorganisms-07-00415-s001.pdf [file microorganisms-07-00415-s001.pdf]

## Supplementary material

### *The Metallochaperone Encoding Gene hypA Is Widely Distributed among Pathogenic Aeromonas spp. and Its Expression Is Increased under Acidic pH and within Macrophages.*

Ana Fernández-Bravo, Loida López-Fernández\*, Maria José Figueras\*.

Unit of Microbiology, Department of Basic Health Sciences, Faculty of Medicine and Health Sciences, IISPV, University Rovira i Virgili, Reus, Spain.

\*Correspondence: Dr. Maria José Figueras, mariajose.figueras@urv.cat; Dr. Loida López-Fernández, loida.lopez@urv.cat

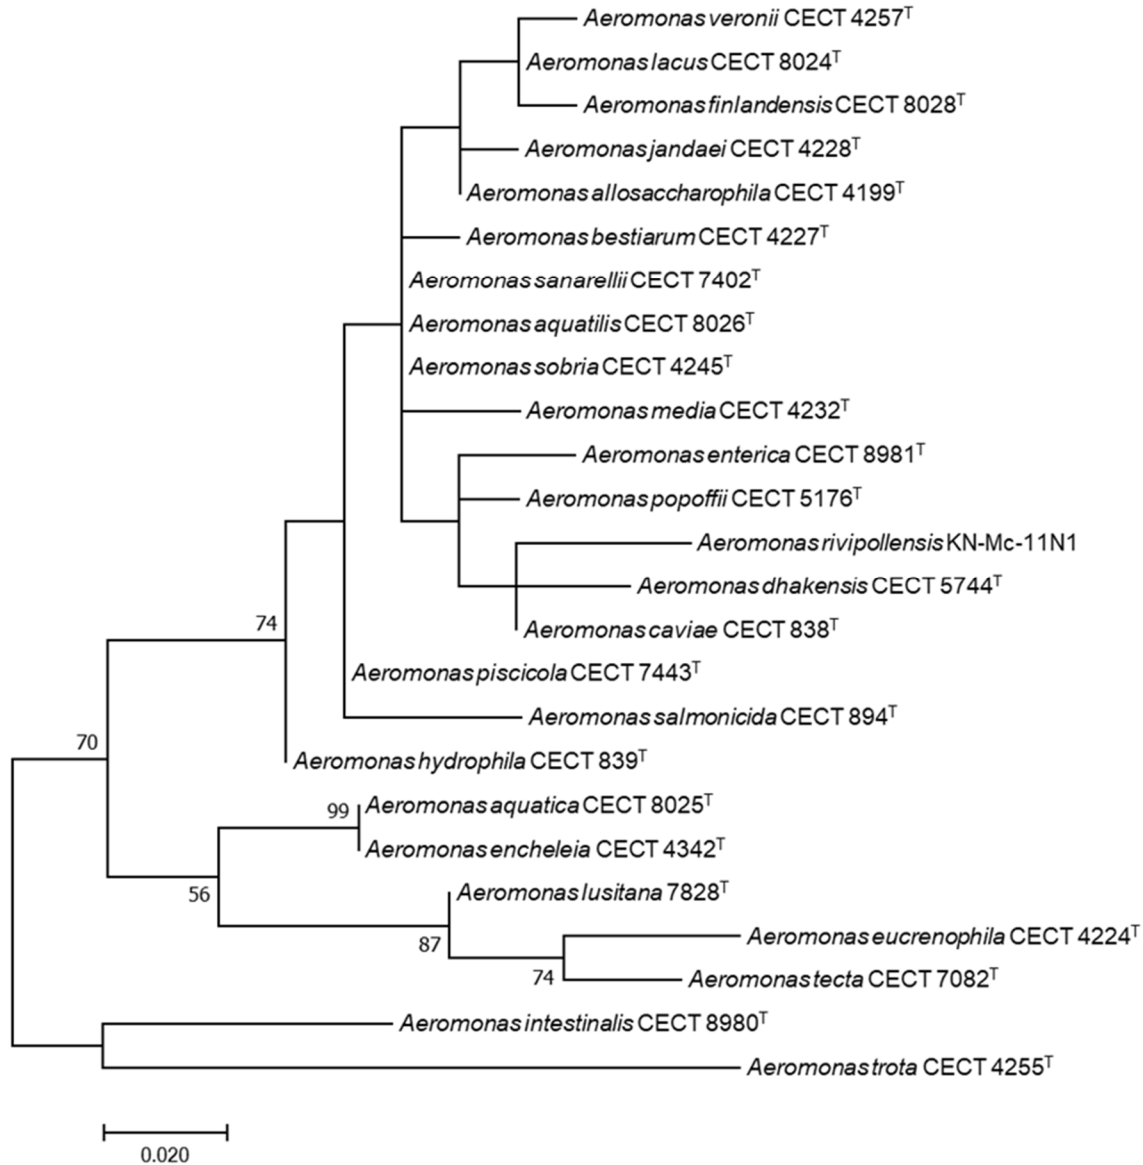

**Figure S1.** Phylogenetic tree constructed with 25 species of *Aeromonas* based on sequences of the protein HypA by the Maximum-Likelihood algorithm (model JTT+G). Numbers at nodes denote the level of bootstrap based on 1000 replicates; only values greater than 50% are shown. Scale bar, base substitutions per site.

**Table S1.** Genetic analyses and diversity of *hypA* presence at strain-level in 143 genomes from 36 different species from the genus *Aeromonas*. <sup>†</sup> indicates type strain.

| Species                     | Strain                 | Identified (NCBI)           | Accession number (genome) | Re-identification           | HypA Presence | Rate of hypA presence (%) |
|-----------------------------|------------------------|-----------------------------|---------------------------|-----------------------------|---------------|---------------------------|
| <i>A. allosaccharophila</i> | CECT 4199 <sup>†</sup> | <i>A. allosaccharophila</i> | NZ_CDBR00000000.1         | -                           | Yes           | 4/4<br>(100)              |
|                             | BVH88                  | <i>A. allosaccharophila</i> | NZ_CDCCB00000000.1        | <i>A. allosaccharophila</i> | Yes           |                           |
|                             | Z9-6                   | <i>A. allosaccharophila</i> | NZ_NXBS00000000.1         | <i>A. allosaccharophila</i> | Yes           |                           |
|                             | TTU2014-               | <i>A. allosaccharophila</i> | NZ_CDCCB00000000.1        | <i>A. allosaccharophila</i> | Yes           |                           |
| <i>A. bestiarum</i>         | CECT 4227 <sup>†</sup> | <i>A. bestiarum</i>         | NZ_CDDA00000000.1         | -                           | Yes           | 2/2<br>100                |
|                             | CA23                   | <i>Aeromonas sp.</i>        | NZ_CP023818.1             | <i>A. bestiarum</i>         | Yes           |                           |
| <i>A. bivalvium</i>         | CECT 7113 <sup>†</sup> | <i>A. bivalvium</i>         | NZ_CDBT00000000.1         | -                           | No            | 3/3<br>100                |
|                             | ZJ19-2                 | <i>A. bivalvium</i>         | NZ_NXBQ00000000.1         | <i>A. bivalvium</i>         | No            |                           |
|                             | ZJ20-2                 | <i>A. bivalvium</i>         | NZ_NXBX00000000.1         | <i>A. bivalvium</i>         | No            |                           |
| <i>A. caviae</i>            | CECT 838 <sup>†</sup>  | <i>A. caviae</i>            | NZ_CDBK00000000.1         | -                           | Yes           | 14/20<br>(70)             |
|                             | FDAARGOS_7             | <i>A. caviae</i>            | NZ_CP026055.1             | <i>A. caviae</i>            | Yes           |                           |
|                             | NCTC12244              | <i>A. caviae</i>            | NZ_LS483441.1             | <i>A. caviae</i>            | Yes           |                           |
|                             | R25-6                  | <i>A. caviae</i>            | NZ_CP025705.1             | <i>A. caviae</i>            | Yes           |                           |
|                             | ASNIH3                 | <i>Aeromonas sp.</i>        | NZ_CP026222.1             | <i>A. caviae</i>            | Yes           |                           |
|                             | 8LM                    | <i>A. caviae</i>            | NZ_CP024198.1             | <i>A. caviae</i>            | Yes           |                           |
|                             | Aer593                 | <i>A. caviae</i>            | NZ_RQJZ00000000.1         | <i>A. caviae</i>            | Yes           |                           |
|                             | CHZ306                 | <i>A. caviae</i>            | NZ_MDSC00000000.1         | <i>A. caviae</i>            | Yes           |                           |
|                             | HAMBI_1972             | <i>A. caviae</i>            | NZ_QLLA00000000.1         | <i>A. caviae</i>            | Yes           |                           |
|                             | FDAARGOS_7             | <i>A. caviae</i>            | NZ_JTBH00000000.2         | <i>A. caviae</i>            | Yes           |                           |
|                             | GEO_48_Eff_A           | <i>A. caviae</i>            | NZ_QKOS00000000.1         | <i>A. caviae</i>            | Yes           |                           |
|                             | GEO_47_Up_A            | <i>A. caviae</i>            | NZ_QKOU00000000.1         | <i>A. caviae</i>            | Yes           |                           |
|                             | CH129                  | <i>A. caviae</i>            | NZ_MDSD00000000.1         | <i>A. caviae</i>            | Yes           |                           |
|                             | S2-003-000-            | <i>A. media</i>             | QFQK00000000.1            | <i>A. caviae</i>            | Yes           |                           |
|                             | T25-39                 | <i>A. caviae</i>            | NZ_CP025706               | <i>A. caviae</i>            | No            |                           |
|                             | WCW1-2                 | <i>A. caviae</i>            | NZ_CP039832               | <i>A. caviae</i>            | No            |                           |
|                             | GSH8M-1                | <i>A. caviae</i>            | NZ_AP019195               | <i>A. caviae</i>            | No            |                           |
|                             | R25-2                  | <i>A. caviae</i>            | NZ_CP025777               | <i>A. caviae</i>            | No            |                           |
|                             | ASNHI7                 | <i>Aeromonas sp.</i>        | NZ_CP026226               | <i>A. caviae</i>            | No            |                           |
| ASNHI1                      | <i>Aeromonas sp.</i>   | NZ_CP026228                 | <i>A. caviae</i>          | No                          |               |                           |
| <i>A. dhakensis</i>         | CECT 5744 <sup>†</sup> | <i>A. dhakensis</i>         | NZ_CDBH00000000.1         | -                           | Yes           | 10/10<br>(100)            |
|                             | BVH70                  | <i>A. dhakensis</i>         | NZ_NKWO00000000.1         | <i>A. dhakensis</i>         | Yes           |                           |
|                             | BVH68                  | <i>A. dhakensis</i>         | NZ_NKWQ00000000.1         | <i>A. dhakensis</i>         | Yes           |                           |
|                             | BVH69                  | <i>A. dhakensis</i>         | NZ_NKWP00000000.1         | <i>A. dhakensis</i>         | Yes           |                           |
|                             | KN-Mc-6U21             | <i>A. dhakensis</i>         | NZ_CP023141.1             | <i>A. dhakensis</i>         | Yes           |                           |
|                             | Cr2                    | <i>A. dhakensis</i>         | NZ_LBDJ00000000.1         | <i>A. dhakensis</i>         | Yes           |                           |
|                             | Aer283                 | <i>A. dhakensis</i>         | NZ_RQKD00000000.1         | <i>A. dhakensis</i>         | Yes           |                           |
|                             | 277                    | <i>A. dhakensis</i>         | NZ_AOBQ00000000.1         | <i>A. dhakensis</i>         | Yes           |                           |
|                             | KOR1                   | <i>A. dhakensis</i>         | NZ_LJOE00000000.1         | <i>A. dhakensis</i>         | Yes           |                           |
|                             | L14h                   | <i>A. jandaei</i>           | NZ_JWJR00000000.1         | <i>A. dhakensis</i>         | Yes           |                           |
| <i>A. hydrophila</i>        | CECT 839 <sup>†</sup>  | <i>A. hydrophila</i>        | NC_008570.1               | -                           | Yes           | 33/33<br>(100)            |
|                             | Ae34                   | <i>A. hydrophila</i>        | NZ_BAXY00000000.1         | <i>A. hydrophila</i>        | Yes           |                           |
|                             | AH10                   | <i>A. hydrophila</i>        | NZ_CP011100.1             | <i>A. hydrophila</i>        | Yes           |                           |
|                             | AL06-01                | <i>A. hydrophila</i>        | SAMN01085623              | <i>A. hydrophila</i>        | Yes           |                           |
|                             | AL10-121               | <i>A. hydrophila</i>        | NZ_LRRW00000000.1         | <i>A. hydrophila</i>        | Yes           |                           |
|                             | 226                    | <i>A. hydrophila</i>        | NZ_JEML00000000.1         | <i>A. hydrophila</i>        | Yes           |                           |
|                             | ML09-121               | <i>A. hydrophila</i>        | NZ_LRRX00000000.1         | <i>A. hydrophila</i>        | Yes           |                           |
|                             | AD9                    | <i>A. hydrophila</i>        | NZ_JFJO00000000.1         | <i>A. hydrophila</i>        | Yes           |                           |
|                             | RB-AH                  | <i>A. hydrophila</i>        | NZ_JPEH00000000.1         | <i>A. hydrophila</i>        | Yes           |                           |
|                             | YL17                   | <i>A. hydrophila</i>        | NZ_CP007518.2             | <i>A. hydrophila</i>        | Yes           |                           |

| Species                 | Strain                 | Identified (NCBI)       | Accession number (genome) | Re-identification       | HypA Presence | Rate of hypA presence (%) |
|-------------------------|------------------------|-------------------------|---------------------------|-------------------------|---------------|---------------------------|
|                         | AL06-06                | <i>A. hydrophila</i>    | NZ_CP010947.1             | <i>A. hydrophila</i>    | Yes           |                           |
|                         | KN-Mc-1R2              | <i>A. hydrophila</i>    | NZ_CP027804.1             | <i>A. hydrophila</i>    | Yes           |                           |
|                         | ASNIH4                 | <i>Aeromonas sp.</i>    | NZ_CP026217.1             | <i>A. hydrophila</i>    | Yes           |                           |
|                         | GYK1                   | <i>A. hydrophila</i>    | NZ_CP016392.1             | <i>A. hydrophila</i>    | Yes           |                           |
|                         | D4                     | <i>A. hydrophila</i>    | NZ_CP013965.1             | <i>A. hydrophila</i>    | Yes           |                           |
|                         | JBN2301                | <i>A. hydrophila</i>    | NZ_CP013178.1             | <i>A. hydrophila</i>    | Yes           |                           |
|                         | NJ-35                  | <i>A. hydrophila</i>    | NZ_CP006870.1             | <i>A. hydrophila</i>    | Yes           |                           |
|                         | J-1                    | <i>A. hydrophila</i>    | NZ_CP006883.1             | <i>A. hydrophila</i>    | Yes           |                           |
|                         | pc104A                 | <i>A. hydrophila</i>    | NZ_CP007576.1             | <i>A. hydrophila</i>    | Yes           |                           |
|                         | AL09-71                | <i>A. hydrophila</i>    | NZ_CP007566.1             | <i>A. hydrophila</i>    | Yes           |                           |
|                         | WCHAH04509             | <i>A. hydrophila</i>    | NZ_CP028568.2             | <i>A. hydrophila</i>    | Yes           |                           |
|                         | ZYAH72                 | <i>A. hydrophila</i>    | NZ_CP016989.1             | <i>A. hydrophila</i>    | Yes           |                           |
|                         | AHNIH1                 | <i>A. hydrophila</i>    | NZ_CP016380.1             | <i>A. hydrophila</i>    | Yes           |                           |
|                         | MS-18-37               | <i>A. hydrophila</i>    | NZ_CP033604.1             | <i>A. hydrophila</i>    | Yes           |                           |
|                         | ZYAH75                 | <i>A. hydrophila</i>    | NZ_CP016990.1             | <i>A. hydrophila</i>    | Yes           |                           |
|                         | FC951                  | <i>A. hydrophila</i>    | NZ_CP032839.1             | <i>A. hydrophila</i>    | Yes           |                           |
|                         | MX16A                  | <i>A. hydrophila</i>    | NZ_CP018201.1             | <i>A. hydrophila</i>    | Yes           |                           |
|                         | WCX23 <sup>a</sup>     | <i>A. hydrophila</i>    | NZ_CP038463.1             | <i>A. hydrophila</i>    | Yes           |                           |
|                         | WCX23 <sup>a</sup>     | <i>A. hydrophila</i>    | CP028418.1                | <i>A. hydrophila</i>    | Yes           |                           |
|                         | GSH8-2 DNA             | <i>A. hydrophila</i>    | NZ_AP019193.1             | <i>A. hydrophila</i>    | Yes           |                           |
|                         | 23-C-23                | <i>A. hydrophila</i>    | NZ_CP038465.1             | <i>A. hydrophila</i>    | Yes           |                           |
|                         | 4AK4                   | <i>A. hydrophila</i>    | NZ_CP006579.1             | <i>A. hydrophila</i>    | Yes           |                           |
|                         | AH10                   | <i>A. hydrophila</i>    | NZ_CP011100.1             | <i>A. hydrophila</i>    | Yes           |                           |
| <i>A. jandaei</i>       | CECT 4228 <sup>T</sup> | <i>A. jandaei</i>       | NZ_JWJR00000000.1         | -                       | Yes           |                           |
|                         | Riv2                   | <i>A. jandaei</i>       | NZ_JFDL00000000.1         | <i>A. jandaei</i>       | Yes           |                           |
|                         | Aer337                 | <i>A. jandaei</i>       | NZ_RQKB00000000.1         | <i>A. jandaei</i>       | Yes           | 5/5 (100)                 |
|                         | IMET J                 | <i>A. jandaei</i>       | NZ_PRCV00000000.1         | <i>A. jandaei</i>       | Yes           |                           |
|                         | Ho603                  | <i>A. jandaei</i>       | NZ_NKVG00000000.1         | <i>A. jandaei</i>       | Yes           |                           |
| <i>A. media</i>         | CECT 4232 <sup>T</sup> | <i>A. media</i>         | NZ_CDBZ00000000.1         | -                       | yes           |                           |
|                         | ARB13                  | <i>A. media</i>         | NZ_JRBG00000000.1         | <i>A. media</i>         | Yes           |                           |
|                         | ARB20                  | <i>A. media</i>         | NZ_JRBG00000000.1         | <i>A. media</i>         | Yes           | 3/4 (75)                  |
|                         | WS                     | <i>A. media</i>         | NZ_LR134376.1             | <i>A. media</i>         | No            |                           |
| <i>A. rivipollensis</i> | KN-Mc-11N1             | <i>A. rivipollensis</i> | NZ_CP027856.1             | -                       | Yes           |                           |
|                         | BAQ071013-132          | <i>A. media</i>         | NZ_NKWW00000000.1         | <i>A. rivipollensis</i> | Yes           | 3/3 (100)                 |
|                         | Z1-6                   | <i>A. media</i>         | NZ_NXBV00000000.1         | <i>A. rivipollensis</i> | Yes           |                           |
| <i>A. salmonicida</i>   | CECT 894 <sup>T</sup>  | <i>A. salmonicida</i>   | NC_009348.1               | -                       | yes           |                           |
|                         | O23A                   | <i>A. salmonicida</i>   | NZ_CP021654.1             | <i>A. salmonicida</i>   | Yes           |                           |
|                         | 34mel                  | <i>A. salmonicida</i>   | NZ_CP022426.1             | <i>A. salmonicida</i>   | Yes           |                           |
|                         | 01-B526                | <i>A. salmonicida</i>   | NZ_CP027000.1             | <i>A. salmonicida</i>   | Yes           |                           |
|                         | RFAS1                  | <i>A. salmonicida</i>   | NZ_CP017143.1             | <i>A. salmonicida</i>   | Yes           |                           |
|                         | S68                    | <i>A. salmonicida</i>   | NZ_CP022186.1             | <i>A. salmonicida</i>   | Yes           | 10/10 (100)               |
|                         | S44                    | <i>A. salmonicida</i>   | NZ_CP022181.1             | <i>A. salmonicida</i>   | Yes           |                           |
|                         | S121                   | <i>A. salmonicida</i>   | NZ_CP022175.1             | <i>A. salmonicida</i>   | Yes           |                           |
|                         | A449                   | <i>A. salmonicida</i>   | NZ_CP000644.1             | <i>A. salmonicida</i>   | Yes           |                           |
| A527                    | <i>A. salmonicida</i>  | NZ_CP022550.1           | <i>A. salmonicida</i>     | Yes                     |               |                           |
| <i>A. schubertii</i>    | CECT 4240 <sup>T</sup> | <i>A. schubertii</i>    | NZ_CP013067.1             | -                       | No            |                           |
|                         | LF1708                 | <i>A. schubertii</i>    | NZ_CP039611.1             | <i>A. schubertii</i>    | No            | 1/3 (33)                  |
|                         | WL1483                 | <i>A. schubertii</i>    | NZ_CP013067.1             | <i>A. schubertii</i>    | Yes           |                           |
| <i>A. sobria</i>        | CECT 4245 <sup>T</sup> | <i>A. sobria</i>        | NZ_CDBW00000000.1         | -                       | yes           |                           |
|                         | CU5                    | <i>Aeromonas sp.</i>    | NZ_CP023817.1             | <i>A. sobria</i>        | Yes           | 2/2 (100)                 |

| Species                 | Strain                  | Identified (NCBI)                      | Accession number (genome) | Re-identification     | HypA Presence | Rate of hypA presence (%) |
|-------------------------|-------------------------|----------------------------------------|---------------------------|-----------------------|---------------|---------------------------|
| <i>A. taiwanensis</i>   | CECT 7403 <sup>†</sup>  | <i>A. taiwanensis</i>                  | NZ_CDDD00000000.1         | -                     | No            | 0/4<br>(0)                |
|                         | 186                     | <i>A. taiwanensis</i>                  | NZ_QORJ00000000.1         | <i>A. taiwanensis</i> | No            |                           |
|                         | 198                     | <i>A. taiwanensis</i>                  | NZ_QORK00000000.1         | <i>A. taiwanensis</i> | No            |                           |
|                         | 1713                    | <i>A. taiwanensis</i>                  | NZ_QORL00000000.1         | <i>A. taiwanensis</i> | No            |                           |
| <i>A. veronii</i>       | CECT 4257 <sup>†</sup>  | <i>A. veronii</i>                      | NC_015424.1               | -                     | yes           | 18/18<br>(100)            |
|                         | AER39                   | <i>A. veronii</i>                      | NZ_AGWT00000000.1         | <i>A. veronii</i>     | Yes           |                           |
|                         | AMC34                   | <i>A. veronii</i>                      | NZ_AGWU00000000.1         | <i>A. veronii</i>     | Yes           |                           |
|                         | AMC35                   | <i>A. veronii</i>                      | NZ_AGWW00000000.1         | <i>A. veronii</i>     | Yes           |                           |
|                         | A134                    | <i>A. veronii</i>                      | NZ_RSFC00000000.1         | <i>A. veronii</i>     | Yes           |                           |
|                         | Hm21                    | <i>A. veronii</i>                      | NZ_ATFB00000000.1         | <i>A. veronii</i>     | Yes           |                           |
|                         | Aer 397                 | <i>A. veronii</i>                      | NZ_AGWV00000000.1         | <i>A. veronii</i>     | Yes           |                           |
|                         | Hm22                    | <i>A. veronii</i>                      | NZ_NKWH00000000.1         | <i>A. veronii</i>     | Yes           |                           |
|                         | TTU2014-                | <i>A. veronii</i>                      | NZ_LKKB00000000.1         | <i>A. veronii</i>     | Yes           |                           |
|                         | X11                     | <i>A. veronii</i>                      | NZ_CP024930.1             | <i>A. veronii</i>     | Yes           |                           |
|                         | B565                    | <i>A. veronii</i>                      | NC_015424.1               | <i>A. veronii</i>     | Yes           |                           |
|                         | TH0426                  | <i>A. veronii</i>                      | NZ_CP012504.1             | <i>A. veronii</i>     | Yes           |                           |
|                         | AVNIH1                  | <i>A. veronii</i>                      | NZ_CP014774.1             | <i>A. veronii</i>     | Yes           |                           |
|                         | CB51                    | <i>A. veronii</i>                      | NZ_CP015448.1             | <i>A. veronii</i>     | Yes           |                           |
|                         | 17ISAe                  | <i>A. veronii</i>                      | NZ_CP028133.1             | <i>A. veronii</i>     | Yes           |                           |
|                         | X12                     | <i>A. veronii</i>                      | NZ_CP024933.1             | <i>A. veronii</i>     | Yes           |                           |
|                         | Hm22                    | <i>A. veronii</i>                      | NZ_NKWH00000000.1         | <i>A. veronii</i>     | Yes           |                           |
|                         | E20102                  | <i>A. veronii</i>                      | NZ_QIMH00000000.1         | <i>A. veronii</i>     | Yes           |                           |
| <i>A. trota</i>         | CECT 4255 <sup>†</sup>  | <i>A. enteropelogenes</i> <sup>b</sup> | NZ_CDDE00000000.1         | <i>A. trota</i>       | Yes           | 4/4<br>(100)              |
|                         | Aer371                  | <i>A. enteropelogenes</i> <sup>b</sup> | NZ_RQKA00000000.1         | <i>A. trota</i>       | Yes           |                           |
|                         | LK14                    | <i>A. enteropelogenes</i> <sup>b</sup> | NZ_LDWG00000000.1         | <i>A. trota</i>       | Yes           |                           |
|                         | CECT 4487               | <i>A. enteropelogenes</i> <sup>b</sup> | NZ_CDCG00000000.1         | <i>A. trota</i>       | Yes           |                           |
| <i>A. encheleia</i>     | CECT 4342 <sup>†</sup>  | <i>A. encheleia</i>                    | NZ_LR134376.1             | -                     | Yes           | 2/2<br>(100)              |
|                         | NCTC12917               | <i>A. encheleia</i>                    | NZ_LR134376.1             | <i>A. encheleia</i>   | Yes           |                           |
| <i>A. aquatilis</i>     | CECT 8026 <sup>†</sup>  | <i>A. aquatilis</i>                    | c                         | -                     | Yes           | -                         |
| <i>A. aquatica</i>      | CECT 8025 <sup>†</sup>  | <i>A. aquatica</i>                     | NZ_JRGL00000000.1         | -                     | Yes           | -                         |
| <i>A. enterica</i>      | CECT 8981 <sup>†</sup>  | <i>A. enterica</i>                     | c                         | -                     | Yes           | -                         |
| <i>A. eucrenophila</i>  | CECT 4224 <sup>†</sup>  | <i>A. eucrenophila</i>                 | NZ_CDDF00000000.1         | -                     | Yes           | -                         |
| <i>A. intestinalis</i>  | CECT 8980 <sup>†</sup>  | <i>A. intestinalis</i>                 | c                         | -                     | Yes           | -                         |
| <i>A. finlandensis</i>  | CECT 8028 <sup>†</sup>  | <i>A. finlandensis</i>                 | NZ_JRGK00000000.1         | -                     | Yes           | -                         |
| <i>A. lacus</i>         | CECT 8024 <sup>†</sup>  | <i>A. lacus</i>                        | NZ_JRGM00000000.1         | -                     | Yes           | -                         |
| <i>A. piscicola</i>     | CECT 7443 <sup>†</sup>  | <i>A. piscicola</i>                    | NZ_CDBL00000000.1         | -                     | Yes           | -                         |
| <i>A. popoffi</i>       | CECT 5176 <sup>†</sup>  | <i>A. popoffi</i>                      |                           | -                     | Yes           | -                         |
| <i>A. sanarelli</i>     | CECT 7402 <sup>†</sup>  | <i>A. sanarelli</i>                    | NZ_CDBN00000000.1         | -                     | Yes           | -                         |
| <i>A. tecta</i>         | CECT 7082 <sup>†</sup>  | <i>A. tecta</i>                        | NZ_CDCA00000000.1         | -                     | Yes           | -                         |
| <i>A. australiensis</i> | CECT 8023 <sup>†</sup>  | <i>A. australiensis</i>                | NZ_CDDH00000000.1         | -                     | No            | -                         |
| <i>A. cavernicola</i>   | CECT 7862 <sup>†</sup>  | <i>A. cavernicola</i>                  | NZ_PGGC00000000.1         | -                     | No            | -                         |
| <i>A. crassostreae</i>  | CECT 8982 <sup>†</sup>  | <i>A. crassostreae</i>                 | c                         | -                     | No            | -                         |
| <i>A. diversa</i>       | CECT 4254 <sup>†</sup>  | <i>A. diversa</i>                      | NZ_APVG00000000.1;        | -                     | No            | -                         |
| <i>A. fluvialis</i>     | CECT 7401 <sup>†</sup>  | <i>A. fluvialis</i>                    | NZ_CDBO00000000.1         | -                     | No            | -                         |
| <i>A. molluscorum</i>   | CECT 5864 <sup>†</sup>  | <i>A. molluscorum</i>                  | NZ_AQGQ00000000.1;        | -                     | No            | -                         |
| <i>A. rivuli</i>        | CECT 7518 <sup>†</sup>  | <i>A. rivuli</i>                       | NZ_CDBJ00000000.1         | -                     | No            | -                         |
| <i>A. simiae</i>        | IBS S-6874 <sup>†</sup> | <i>A. simiae</i>                       | NZ_CDBY00000000.1         | -                     | No            | -                         |

a Two different sequences with the same name.

b. *A. enteropelogenes* is a synonym of *A. trota*.

c. Draft genomes not freely available.

**Table S2.** A total of 95 true positives protein sequences of HypA from 60 genus and 77 species of bacteria obtained from Prosite and Uniprot databases.

| Species                                   | Protein ID                           | Species                                | Protein ID                           |
|-------------------------------------------|--------------------------------------|----------------------------------------|--------------------------------------|
| <i>Actinobacillus succinogenes</i>        | <a href="#">HYPA_ACTSZ (A6VPH7)</a>  | <i>Legionella pneumophila</i>          | <a href="#">HYPA_LEGPH (Q5ZSP1)</a>  |
| <i>Aeromonas hydrophila</i>               | <a href="#">HYPA_AERHH (A0KL76)</a>  | <i>Legionella pneumophila</i>          | <a href="#">HYPA_LEGPA (Q5X252)</a>  |
| <i>Aeromonas salmonicida</i>              | <a href="#">HYPA_AERS4 (A4SLV6)</a>  | <i>Legionella pneumophila</i>          | <a href="#">HYPA_LEGPL (Q5WTX7)</a>  |
| <i>Anabaena variabilis</i>                | <a href="#">HYPA_ANAVT (Q3M482)</a>  | <i>Legionella pneumophila</i>          | <a href="#">HYPA_LEGPC (A5IEY2)</a>  |
| <i>Aquifex aeolicus</i>                   | <a href="#">HYPA_AQUAE (O67133)</a>  | <i>Methanococcus jannaschii</i>        | <a href="#">HYPA_METJA (Q57667)</a>  |
| <i>Anacystis nidulans</i>                 | <a href="#">HYPA_SYNP6 (P94160)</a>  | <i>Methanosarcina barkeri</i>          | <a href="#">HYPA_METBF (Q46BF1)</a>  |
| <i>Archaeoglobus fulgidus</i>             | <a href="#">HYPA_ARCFU (O28904)</a>  | <i>Methanosarcina acetivorans</i>      | <a href="#">HYPA_METAC (Q8TRN7)</a>  |
| <i>Azotobacter chroococcum</i>            | <a href="#">HYPA_AZOCH (Q43948)</a>  | <i>Methanospaera stadmanae</i>         | <a href="#">HYPA_METST (Q2NEZ5)</a>  |
| <i>Azoarcus sp.</i>                       | <a href="#">HYPA_AZOSB (A1KC59)</a>  | <i>Methanothermobacter</i>             | <a href="#">HYPA_METTH (O26876)</a>  |
| <i>Azotobacter vinelandii</i>             | <a href="#">HYPA_AZOVI (P31879)</a>  | <i>Methylacidiphilum infernorum</i>    | <a href="#">HYPA_METI4 (B3DWG1)</a>  |
| <i>Beijerinckia indica</i>                | <a href="#">HYPA_BEI19 (B2IJ38)</a>  | <i>Methanobrevibacter smithii</i>      | <a href="#">HYPA_METS3 (A5UJD5)</a>  |
| <i>Bradyrhizobium diazoefficiens</i>      | <a href="#">HYPA2_BRADU (Q45256)</a> | <i>Methanopyrus kandleri</i>           | <a href="#">HYPA_METKA (Q8TV53)</a>  |
| <i>Bradyrhizobium sp.</i>                 | <a href="#">HYPA_BRASO (A4YNU5)</a>  | <i>Methanosarcina Frisia</i>           | <a href="#">HYPA_METMA (Q8PUL7)</a>  |
| <i>Campylobacter jejuni</i>               | <a href="#">HYPA_CAMJE (Q9PHP0)</a>  | <i>Nitratiruptor sp.</i>               | <a href="#">HYPA_NITSB (A6Q3N0)</a>  |
| <i>Chloroflexus aurantiacus</i>           | <a href="#">HYPA_CHLSY (B9LLZ7)</a>  | <i>Nostoc punctiforme</i>              | <a href="#">HYPA_NOSP7 (Q9EYH3)</a>  |
| <i>Chloroflexus aurantiacus</i>           | <a href="#">HYPA_CHLAA (A9WK98)</a>  | <i>Nostoc sp.</i>                      | <a href="#">HYPA_NOSS1 (O30461)</a>  |
| <i>Chloroflexus aggregans</i>             | <a href="#">HYPA_CHLAD (B8G3M6)</a>  | <i>Paracoccus denitrificans</i>        | <a href="#">HYPA_PARDP (A1B6P4)</a>  |
| <i>Chlorobaculum tepidum</i>              | <a href="#">HYPA_CHLTE (Q8KB18)</a>  | <i>Pectobacterium atrosepticum</i>     | <a href="#">HYPA_PECAS (Q6D7U0)</a>  |
| <i>Chlorobium limicola</i>                | <a href="#">HYPA_CHLL2 (B3EEL6)</a>  | <i>Pelodictyon phaeoclathratiforme</i> | <a href="#">HYPA_PELPB (B4SCQ5)</a>  |
| <i>Chlorobium luteolum</i>                | <a href="#">HYPA_CHLL7 (Q3B2W3)</a>  | <i>Polaromonas naphthalenivorans</i>   | <a href="#">HYPA_POLNA (A1VNP5)</a>  |
| <i>Chlorobium vibrioforme</i>             | <a href="#">HYPA_CHLP8 (B3QQ33)</a>  | <i>Pyrococcus furiosus</i>             | <a href="#">HYPA_PYRFU (Q8U357)</a>  |
| <i>Chlorobium phaeobacteroides</i>        | <a href="#">HYPA_CHLPB (B3EL96)</a>  | <i>Pyrococcus horikoshii</i>           | <a href="#">HYPA_PYRHO (O59267)</a>  |
| <i>Cupriavidus necator</i>                | <a href="#">HYPA_CUPNH (P31901)</a>  | <i>Prosthecochloris aestuarii</i>      | <a href="#">HYPA_PROA2 (B4S9J3)</a>  |
| <i>Dechloromonas aromatica</i>            | <a href="#">HYPA_DECAR (Q478M5)</a>  | <i>Psychromonas ingrahamii</i>         | <a href="#">HYPA_PSYIN (A1SU80)</a>  |
| <i>Dehalococcoides ethenogenes</i>        | <a href="#">HYPA_DEHM1 (Q3Z6L1)</a>  | <i>Pyrococcus abyssi</i>               | <a href="#">HYPA_PYRAB (Q9V148)</a>  |
| <i>Dehalococcoides mccartyi</i>           | <a href="#">HYPA_DEHMC (Q3ZYW6)</a>  | <i>Rhizobium leguminosarum</i>         | <a href="#">HYPA_RHILV (P28154)</a>  |
| <i>Dehalococcoides mccartyi</i>           | <a href="#">HYPA_DEHMB (A5FPQ5)</a>  | <i>Rhodobacter capsulatus</i>          | <a href="#">HYPA_RHOCA (P26409)</a>  |
| <i>Deinococcus radiodurans</i>            | <a href="#">HYPA_DEIRA (Q9RYJ6)</a>  | <i>Rhodoferrax ferrireducens</i>       | <a href="#">HYPA_RHOFT (Q21R10)</a>  |
| <i>Desulfococcus oleovorans</i>           | <a href="#">HYPA_DESOH (A8ZZG8)</a>  | <i>Rhodopseudomonas palustris</i>      | <a href="#">HYPA_RHOP5 (Q07S91)</a>  |
| <i>Desulfatibacillum aliphaticivorans</i> | <a href="#">HYPA_DESAL (B8FH08)</a>  | <i>Rhodobacter sphaeroides</i>         | <a href="#">HYPA_RHOSK (B9KKQ0)</a>  |
| <i>Desulfovibrio magneticus</i>           | <a href="#">HYPA_DESMR (C4XS28)</a>  | <i>Rhodobacter sphaeroides</i>         | <a href="#">HYPA_RHOS1 (A3PLP3)</a>  |
| <i>Desulfovibrio vulgaris</i>             | <a href="#">HYPA1_DESVH (Q729M2)</a> | <i>Rhodobacter sphaeroides</i>         | <a href="#">HYPA_RHOS4 (Q3J0K8)</a>  |
| <i>Desulfovibrio vulgaris</i>             | <a href="#">HYPA2_DESVH (Q729Q7)</a> | <i>Rhodobacter sphaeroides</i>         | <a href="#">HYPA_RHOSH (Q9REM0)</a>  |
| <i>Escherichia coli</i>                   | <a href="#">HYPA_ECOL6 (Q8FEL9)</a>  | <i>Rippkaea orientalis</i>             | <a href="#">HYPA_RIPO1 (B7JUE3)</a>  |
| <i>Escherichia coli</i>                   | <a href="#">HYPA_ECOLI (P0A700)</a>  | <i>Salmonella typhi</i>                | <a href="#">HYPA_SALTI (P64420)</a>  |
| <i>Escherichia coli</i>                   | <a href="#">HYPA_ECO57 (P0A701)</a>  | <i>Salmonella typhimurium</i>          | <a href="#">HYPA_SALTY (P64419)</a>  |
| <i>Geobacter daltonii</i>                 | <a href="#">HYPA_GEODF (B9M4A8)</a>  | <i>Shewanella baltica</i>              | <a href="#">HYPA_SHEB8 (A6WMK8)</a>  |
| <i>Geobacter metallireducens</i>          | <a href="#">HYPA_GEOMG (Q39QV5)</a>  | <i>Shigella flexneri</i>               | <a href="#">HYPA_SHIFL (P0A702)</a>  |
| <i>Geobacter sulfurreducens</i>           | <a href="#">HYPA_GEOSL (Q74G73)</a>  | <i>Syntrophus aciditrophicus</i>       | <a href="#">HYPA_SYNAS (Q2LVX4)</a>  |
| <i>Geobacter sp.</i>                      | <a href="#">HYPA_GEOSM (C6E310)</a>  | <i>Synechococcus elongatus</i>         | <a href="#">HYPA_SYNE7 (Q31K36)</a>  |
| <i>Geobacter uraniireducens</i>           | <a href="#">HYPA_GEOUR (A5GFC7)</a>  | <i>Synechococcus sp.</i>               | <a href="#">HYPA_SYNP2 (Q8KX22)</a>  |
| <i>Helicobacter pylori</i>                | <a href="#">HYPA_HELPJ (P0A0U5)</a>  | <i>Synechocystis sp.</i>               | <a href="#">HYPA1_SYNY3 (P74263)</a> |
| <i>Helicobacter pylori</i>                | <a href="#">HYPA_HELPY (P0A0U4)</a>  | <i>Synechocystis sp.</i>               | <a href="#">HYPA2_SYNY3 (P73269)</a> |
| <i>Ignicoccus hospitalis</i>              | <a href="#">HYPA_IGNH4 (A8AAQ5)</a>  | <i>Thermococcus gammatolerans</i>      | <a href="#">HYPA_THEGJ (C5A3C3)</a>  |
| <i>Klebsiella pneumoniae</i>              | <a href="#">HYPA_KLEP3 (B5XV79)</a>  | <i>Thermococcus kodakaraensis</i>      | <a href="#">HYPA_THEKO (Q5JIH3)</a>  |
| <i>Klebsiella pneumoniae</i>              | <a href="#">HYPA_KLEP7 (A6TCZ3)</a>  | <i>Thermococcus onnurineus</i>         | <a href="#">HYPA_THEON (B6YT59)</a>  |
| <i>Lawsonia intracellularis</i>           | <a href="#">HYPA_LAWIP (Q1MRS4)</a>  | <i>Thermomicrobium roseum</i>          | <a href="#">HYPA_THERP (B9L1X1)</a>  |
|                                           |                                      | <i>Trichodesmium erythraeum</i>        | <a href="#">HYPA_TRIEI (Q117V9)</a>  |
